# Supplementary material for: A generative model of hyperelastic strain energy density functions for multiple tissue brain deformation
Source: PubMed Central journal article supplement (PMC7822772; doi:10.1007/s11548-020-02284-y), 2020-11-09
Supplement: 11548_2020_2284_MOESM1_ESM.pdf [file 11548_2020_2284_MOESM1_ESM.pdf]

# A Generative Model of Hyperelastic Strain Energy Density Functions for Multiple Tissue Brain Deformation

## Supplemental Material

Alejandro Granados<sup>1</sup> ·  
Fernando Perez-Garcia<sup>3</sup> ·  
Martin Schweiger<sup>1</sup> · Vejay Vakharia<sup>2</sup> ·  
Sjoerd B. Vos<sup>2</sup> · Anna Miserocchi<sup>2</sup> ·  
Andrew W. McEvoy<sup>2</sup> · John S. Duncan<sup>2</sup> ·  
Rachel Sparks<sup>1</sup> · Sébastien Ourselin<sup>1</sup>

Received: date / Accepted: date

**Abstract** *Purpose:* Estimation of brain deformation is crucial during neurosurgery. Whilst mechanical characterisation captures stress-strain relationships of tissue, biomechanical models are limited by experimental conditions. This results in variability reported in the literature. The aim of this work is to demonstrate a generative model of strain energy density functions can estimate the elastic properties of tissue using observed brain deformation. *Methods:* For the generative model a Gaussian Process regression learns elastic potentials from 73 manuscripts. We evaluate the use of Neo-Hookean, Mooney-Rivlin and 1-term Ogden meta-models to guarantee stability. Single and multiple tissue experiments validate the ability of our generative model to estimate tissue properties on a synthetic brain model and in eight temporal lobe resection cases where deformation is observed between pre- and post-operative images. *Results:* Estimated parameters on a synthetic model are close to the known reference with a root mean square error (RMSE) of 0.1 mm and 0.2 mm between surface nodes for single and multiple tissue experiments. In clinical cases, we were able to recover brain deformation from pre- to post-operative images reducing RMSE of differences from 1.37 mm to 1.08 mm on the ventricle surface, and from 5.89 mm to 4.84 mm on the resection cavity surface. *Conclusion:* Our generative model can capture uncertainties related to mechanical characterisation of tissue. When fitting samples from elastography and linear studies, all meta-models performed similarly. The Ogden meta-model performed the best on hyperelastic studies. We were able to predict elastic parameters in a reference model on a synthetic phantom. However, deformation observed in clinical cases is only partly explained using our generative model.

---

✉ E-mail: alejandro.granados@kcl.ac.uk

<sup>1</sup> School of Biomedical Engineering and Imaging Sciences, King's College London, UK

<sup>2</sup> National Hospital for Neurology and Neurosurgery, London, UK

<sup>3</sup> Wellcome/EPSCRC Centre for Interventional and Surgical Sciences, UCL, UK

## 1 Elastic models of brain tissue from the literature

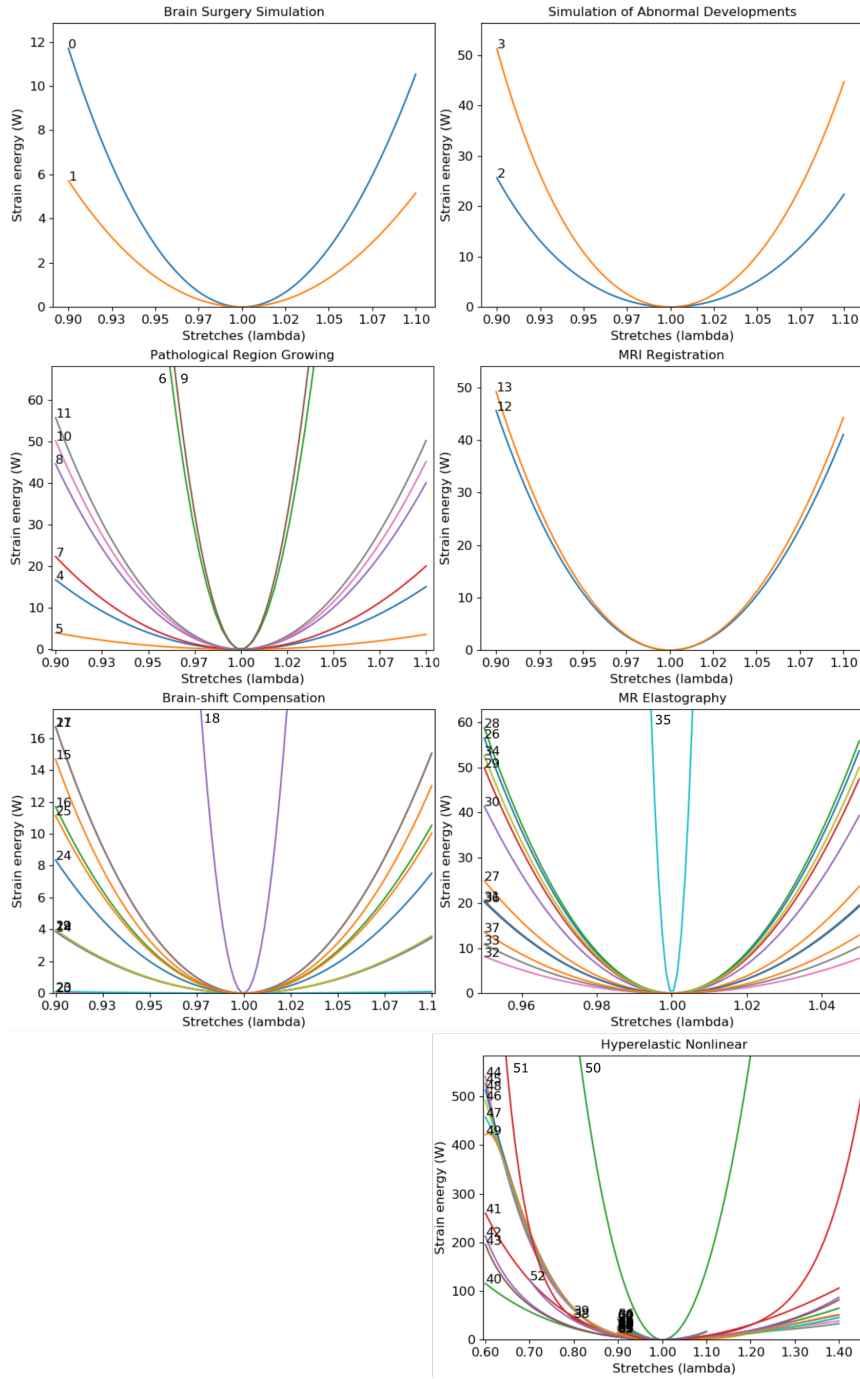

**Fig. 1** Brain tissue models and parameters reported in the literature plotted as strain energy density functions. Horizontal axis refers to the amount of strain during rest ( $\lambda_i = 1$ ), tension ( $\lambda_i > 1$ ), and compression ( $\lambda_i < 1$ ). Vertical axis refers to the elastic potential  $\Psi$ . Numbers correspond to column 'n' in Table 1.

**Table 1** MRE, linear and hyperelastic studies in the literature reporting elastic parameters of grey matter, white matter, healthy brain and abnormalities. Rather than listing every study, especially numerous studies related to linear and MRE models, we refer to the survey presented by Morin et al (2017) [4], where the original references can be found. The exact parameters used from these studies can be located in the source code accompanying this manuscript. In the source code each study is referenced by the study name found in this table.

| n  | Study                                   | Anatomy       | Model        |
|----|-----------------------------------------|---------------|--------------|
| 0  | SurgSim-Dequidt2015 [4]                 | brain         | linear       |
| 1  | SurgSim-Sase2015 [4]                    | brain         | linear       |
| 2  | Abnormal-WM-castellanoSmith2003 [4]     | abnormalities | linear       |
| 3  | Abnormal-GM-castellanoSmith2003 [4]     | abnormalities | linear       |
| 4  | Pathos-Yousefi2013 [4]                  | brain         | linear       |
| 5  | Pathos-Prastawa2009 [4]                 | brain         | linear       |
| 6  | Pathos-TUMOUR-Kyriacou1999 [4]          | abnormalities | hyperelastic |
| 7  | Pathos-WM-Takizawa1994 [4]              | white matter  | linear       |
| 8  | Pathos-GM-Takizawa1994 [4]              | grey matter   | linear       |
| 9  | Pathos-Tumour-Dumpuri2006 [4]           | abnormalities | linear       |
| 10 | BrainShift-tumour-Miller2013 [4]        | abnormalities | linear       |
| 11 | BrainShift-tumour-Morin2016 [4]         | abnormalities | linear       |
| 12 | Reg-min-Soza2004 [4]                    | brain         | linear       |
| 13 | Reg-max-Soza2004 [4]                    | brain         | linear       |
| 14 | BrainShift-Clatz2005 [4]                | brain         | linear       |
| 15 | BrainShift-Witteck2009 [4]              | brain         | linear       |
| 16 | BrainShift-Dumpuri2006 [4]              | brain         | linear       |
| 17 | BrainShift-Vigneron2012 [4]             | brain         | linear       |
| 18 | BrainShift-deLorenzo2012 [4]            | brain         | linear       |
| 19 | BrainShift-Bucki2012 [4]                | brain         | linear       |
| 20 | BrainShift-ventricles-Bucki2012 [4]     | abnormalities | linear       |
| 21 | BrainShift-Miller2013 [4]               | brain         | linear       |
| 22 | BrainShift-Mohammadi2015 [4]            | brain         | linear       |
| 23 | BrainShift-ventricles-Mohammadi2015 [4] | abnormalities | linear       |
| 24 | BrainShift-Morin2016 [4]                | brain         | linear       |
| 25 | BrainShift-Clatz2003 [4]                | brain         | linear       |
| 26 | MRE-WM-Kruse1999 [4]                    | white matter  | MRE          |
| 27 | MRE-GM-Kruse1999 [4]                    | grey matter   | MRE          |
| 28 | MRE-WM-Uffmann2004 [4]                  | white matter  | MRE          |
| 29 | MRE-GM-Uffmann2004 [4]                  | grey matter   | MRE          |
| 30 | MRE-WM-McCracken2005 [4]                | white matter  | MRE          |
| 31 | MRE-GM-McCracken2005 [4]                | grey matter   | MRE          |
| 32 | MRE-WM-Green2006 [4]                    | white matter  | MRE          |
| 33 | MRE-GM-Green2006 [4]                    | grey matter   | MRE          |
| 34 | MRE-WM-Kruse2008 [4]                    | white matter  | MRE          |
| 35 | MRE-abnormal-WM-Kruse2008 [4]           | abnormalities | MRE          |
| 36 | MRE-GM-Kruse2008 [4]                    | grey matter   | MRE          |
| 37 | MRE-Hamhaber2007 [4]                    | brain         | MRE          |
| 38 | Hyperelastic-Ogden1-Mihai2017 [2]       | brain         | hyperelastic |
| 39 | Hyperelastic-MR3-Mihai2017 [2]          | brain         | hyperelastic |
| 40 | Hyperelastic-NH-Mihai2015 [3]           | brain         | hyperelastic |
| 41 | Hyperelastic-MR-Mihai2015 [3]           | brain         | hyperelastic |
| 42 | Hyperelastic-Fung-Mihai2015 [3]         | brain         | hyperelastic |
| 43 | Hyperelastic-Gent-Mihai2015 [3]         | brain         | hyperelastic |
| 44 | Hyperelastic-Ogden3-Mihai2015 [3]       | brain         | hyperelastic |
| 45 | Hyperelastic-Ogden4-Mihai2015 [3]       | brain         | hyperelastic |
| 46 | Hyperelastic-Ogden5-Mihai2015 [3]       | brain         | hyperelastic |
| 47 | Hyperelastic-Ogden6-Mihai2015 [3]       | brain         | hyperelastic |
| 48 | Hyperelastic-Ogden7-Mihai2015 [3]       | brain         | hyperelastic |
| 49 | Hyperelastic-Ogden8-Mihai2015 [3]       | brain         | hyperelastic |
| 50 | Hyperelastic-MR3-Laksari2012 [4]        | brain         | hyperelastic |
| 51 | Hyperelastic-MR2-Schiavone2009 [4]      | brain         | hyperelastic |
| 52 | Hyperelastic-OgdenMod1-Miller2002 [4]   | brain         | hyperelastic |
| 53 | Hyperelastic-NH-CC-Budday2017 [1]       | white matter  | hyperelastic |
| 54 | Hyperelastic-NH-CR-Budday2017 [1]       | white matter  | hyperelastic |
| 55 | Hyperelastic-NH-BG-Budday2017 [1]       | grey matter   | hyperelastic |
| 56 | Hyperelastic-NH-C-Budday2017 [1]        | grey matter   | hyperelastic |
| 57 | Hyperelastic-MR-CC-Budday2017 [1]       | white matter  | hyperelastic |
| 58 | Hyperelastic-MR-CR-Budday2017 [1]       | white matter  | hyperelastic |
| 59 | Hyperelastic-MR-BG-Budday2017 [1]       | grey matter   | hyperelastic |
| 60 | Hyperelastic-MR-C-Budday2017 [1]        | grey matter   | hyperelastic |
| 61 | Hyperelastic-DMR-CC-Budday2017 [1]      | white matter  | hyperelastic |
| 62 | Hyperelastic-DMR-CR-Budday2017 [1]      | white matter  | hyperelastic |
| 63 | Hyperelastic-DMR-BG-Budday2017 [1]      | grey matter   | hyperelastic |
| 64 | Hyperelastic-DMR-C-Budday2017 [1]       | grey matter   | hyperelastic |
| 65 | Hyperelastic-Gent-CC-Budday2017 [1]     | white matter  | hyperelastic |
| 66 | Hyperelastic-Gent-CR-Budday2017 [1]     | white matter  | hyperelastic |
| 67 | Hyperelastic-Gent-BG-Budday2017 [1]     | grey matter   | hyperelastic |
| 68 | Hyperelastic-Gent-C-Budday2017 [1]      | grey matter   | hyperelastic |
| 69 | Hyperelastic-Ogden1-CC-Budday2017 [1]   | white matter  | hyperelastic |
| 70 | Hyperelastic-Ogden1-CR-Budday2017 [1]   | white matter  | hyperelastic |
| 71 | Hyperelastic-Ogden1-BG-Budday2017 [1]   | grey matter   | hyperelastic |
| 72 | Hyperelastic-Ogden1-C-Budday2017 [1]    | grey matter   | hyperelastic |

## 2 Strain energy density functions

2.1 Strain energy density functions in terms of invariants by means of the right Cauchy-Green deformation tensor  $\mathbf{C} = \mathbf{F}^T \mathbf{F}$

$$\begin{aligned} I_c &= \text{trace}(\mathbf{C}) = \lambda_1^2 + \lambda_2^2 + \lambda_3^2 \\ II_c &= \mathbf{C} : \mathbf{C} = \lambda_1^2 \lambda_2^2 + \lambda_2^2 \lambda_3^2 + \lambda_3^2 \lambda_1^2 \\ III_c &= \det \mathbf{C} = \lambda_1^2 \lambda_2^2 \lambda_3^2 \end{aligned} \quad (1)$$

2.2 Meta-models defined under uniaxial mechanical loading, where  $\lambda_2 = \lambda_3 = \lambda_1^{-\frac{1}{2}}$  to ensure volume conservation ( $J = \lambda_1 \lambda_2 \lambda_3 = 1$ )

$$\begin{aligned} \Psi_{NH}(\lambda_1, \lambda_1^{-\frac{1}{2}}, \lambda_1^{-\frac{1}{2}}) &= \frac{\mu}{2}(\lambda_1^2 + 2\lambda_1^{-1} - 3) \\ \Psi_{MR}(\lambda_1, \lambda_1^{-\frac{1}{2}}, \lambda_1^{-\frac{1}{2}}) &= C_1(\lambda_1^2 + 2\lambda_1^{-1} - 3) + C_2(2\lambda_1 + \lambda_1^{-2} - 3) \\ \Psi_{O_1}(\lambda_1, \lambda_1^{-\frac{1}{2}}, \lambda_1^{-\frac{1}{2}}) &= \sum_{p=1}^N \frac{\mu_p}{\alpha_p} (\lambda_1^{\alpha_p} + 2\lambda_1^{-\frac{\alpha_p}{2}} - 3) \end{aligned} \quad (2)$$

2.3 Least squares optimisation of hyperelastic meta-model

$$\begin{aligned} \frac{\partial f_{NH}(\lambda)}{\partial \mu} &= \frac{\frac{1}{2}(\lambda^2 + 2\lambda^{-1} - 3)}{\Psi_{NH} + 0.001} \\ \frac{\partial f_{MR}(\lambda)}{\partial C_1} &= \frac{\lambda^2 + 2\lambda^{-1} - 3}{\Psi_{MR} + 0.001} \\ \frac{\partial f_{MR}(\lambda)}{\partial C_2} &= \frac{2\lambda + \lambda^{-2} - 3}{\Psi_{MR} + 0.001} \\ \frac{\partial f_{O_1}(\lambda)}{\partial \mu_i} &= \frac{\frac{1}{\alpha_i}(\lambda^{\alpha_i} + 2\lambda^{-\frac{\alpha_i}{2}} - 3)}{\Psi_{O_1} + 0.001} \\ \frac{\partial f_{O_1}(\lambda)}{\partial \alpha_i} &= \frac{\frac{\mu_i}{\alpha_i}(\lambda^{\alpha_i} * \ln \lambda - \lambda^{-\frac{\alpha_i}{2}} \ln \lambda) - \frac{\mu_i}{\alpha_i^2}(\lambda^{\alpha_i} + 2\lambda^{-\frac{\alpha_i}{2}} - 3)}{\Psi_{O_1} + 0.001} \end{aligned} \quad (3)$$



### 2.4 Stability conditions

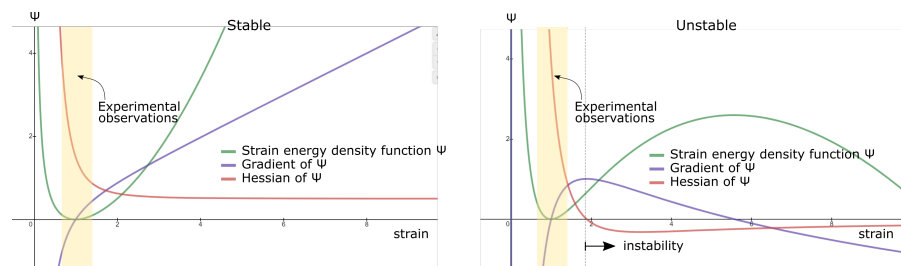

**Fig. 2** Stability conditions of hyperelastic functions. A stable (left) and an unstable (right) function. Shaded area indicates region where parameters are reported in the literature. However, simulation may exhibit deformation over wider strains (see Fig. 7 in [5]).

**Table 2** Stability conditions of hyperelastic strain energy density functions ( $\Psi$ ) at rest ( $\lambda_i = 1$ ), and during compression ( $\lambda_i < 1$ ) and tension ( $\lambda_i > 1$ ).

| Function                                | State       | Condition                                                                                                                                                                                        | Range                                                 |
|-----------------------------------------|-------------|--------------------------------------------------------------------------------------------------------------------------------------------------------------------------------------------------|-------------------------------------------------------|
| $\Psi(\lambda_1, \lambda_2, \lambda_3)$ | Resting     | $\Psi = 0$<br>$\frac{\partial \Psi}{\partial \lambda_i} = 0$<br>$det[\frac{\partial^2 \Psi}{\partial \lambda_i \partial \lambda_j}] > 0$                                                         | $\lambda_1 = 1$<br>$\lambda_2 = 1$<br>$\lambda_3 = 1$ |
|                                         | Compression | $\lim_{\lambda_i \rightarrow 0} \Psi = \infty$<br>$\lim_{\lambda_i \rightarrow 0} \frac{\partial \Psi}{\partial \lambda_i} = -\infty$<br>$\frac{\partial \Psi}{\partial \lambda_i} < 0$          | $0 < \lambda_i < 1$                                   |
|                                         | Tension     | $\lim_{\lambda_i \rightarrow \infty} \Psi = \infty$<br>$\lim_{\lambda_i \rightarrow \infty} \frac{\partial \Psi}{\partial \lambda_i} = \infty$<br>$\frac{\partial \Psi}{\partial \lambda_i} > 0$ | $1 < \lambda_i < \infty$                              |
|                                         | All         | $\frac{\partial^2 \Psi}{\partial \lambda_i^2} > 0$                                                                                                                                               | $0 < \lambda_i < \infty$                              |

### 2.5 Optimisation of meta-models

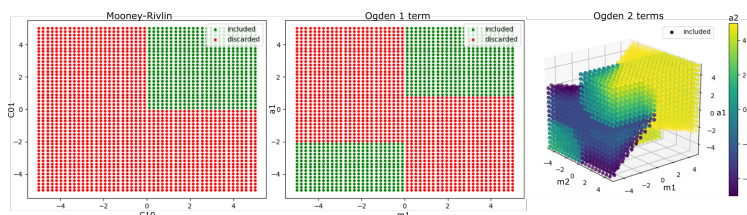

**Fig. 3** Meta-model parameters search space.

**Table 3** Elapsed time of key simulation steps of the deformation of a synthetic phantom. Average time and standard deviation (within parenthesis) are shown in milliseconds for single tissue (st) and multiple tissue (mt) experiments of two volumetric mesh resolution (see Fig. 3 (left) in main manuscript). Simulation was performed on an Alienware 13 R3 laptop with Intel Core i7 CPU @ 2.8GHz, 32GB RAM, x64 Windows 10 OS, and NVIDIA GeForce GTX 1060 with 6GB GPU.

|    |        | Pre-processing | Main loop (in ms)       |                 |              |                  | Main loop     |
|----|--------|----------------|-------------------------|-----------------|--------------|------------------|---------------|
|    |        |                | Compute internal forces | Assemble system | Solve system | Time Integration |               |
| st | coarse | 569            | 27.44 (3.9)             | 18.32 (2.0)     | 63.36 (4.9)  | 4.95 (5.4)       | 118.78 (10.2) |
| st | fine   | 1026           | 36.40 (3.6)             | 28.31 (2.5)     | 90.4 (5.3)   | 4.16 (1.2)       | 164.20 (8.9)  |
| mt | coarse | 2577           | 70.93 (5.2)             | 55.43 (3.6)     | 174.03 (6.1) | 5.91 (7.6)       | 310.90 (11.8) |
| mt | fine   | 9953           | 126.99 (14.9)           | 136.8 (5.6)     | 437.54 (9.5) | 5.27 (1.4)       | 710.87 (17.0) |

### 3 Gaussian Process

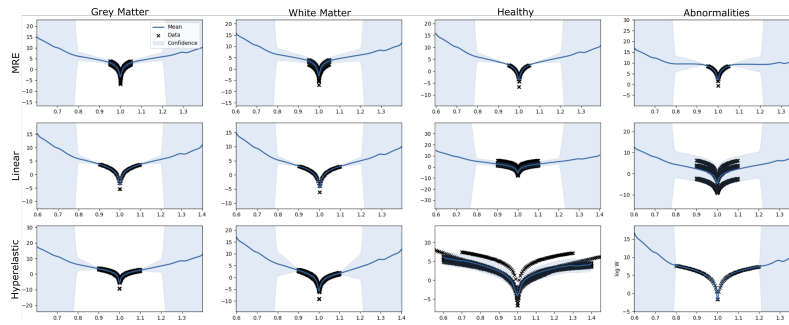

**Fig. 4** Gaussian Process (log space) of strain energy density functions extrapolated over wider ranges of stretches.

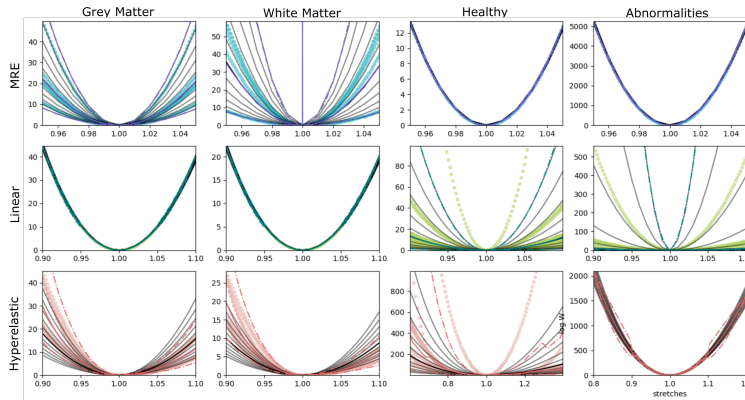

**Fig. 5** GP distributions and sampling of strain energy density functions.

## 4 Simulation

**Table 4** Physical properties of cases and parameters used for simulation. Young’s modulus  $E = 2\mu(1 + \nu)$  and Lamé coefficient  $\lambda = \frac{E\nu}{(1+\nu)(1-2\nu)}$  are using Poisson’s ratio  $\nu = 0.45$ . Total mass is computed based on density  $\rho = 1211.5$ . Implicit backward Euler integration is executed with time step  $h = 0.001$ . Rayleigh matrix  $\mathbf{D} = k_d\mathbf{K} + m_d\mathbf{M}$ , where  $k_d = 0.001$  and  $m_d = 0.0$  are stiffness and damping coefficients, respectively.

| case      | Physical properties        |              |                         |                                        |                          |
|-----------|----------------------------|--------------|-------------------------|----------------------------------------|--------------------------|
|           | volume<br>[ $10^{-3}m^3$ ] | mass<br>[Kg] | density<br>[Kg/ $m^3$ ] | shear modulus<br>[Pa]                  | Poisson’s ratio<br>$\nu$ |
| Synthetic | 1.6092                     | 1.9495       | 1211.5                  | Sampled<br>from<br>generative<br>model | 0.45                     |
| 0529      | 1.1654                     | 1.4119       |                         |                                        |                          |
| 0614      | 1.0617                     | 1.2862       |                         |                                        |                          |
| 0660      | 1.1344                     | 1.3743       |                         |                                        |                          |
| 0685      | 1.0899                     | 1.3204       |                         |                                        |                          |
| 0535      | 1.2388                     | 1.5008       |                         |                                        |                          |
| 0555      | 1.1706                     | 1.4182       |                         |                                        |                          |
| 0603      | 1.0601                     | 1.2843       |                         |                                        |                          |
| 0684      | 1.1865                     | 1.4374       |                         |                                        |                          |

**Table 5** Geometrical properties of clinical cases used for simulation. For each case, we report the total number of nodes and elements, as well as the number of nodes along ventricles and resection margins that are used to compute RMSE (our similarity metric). Median and median absolute deviation are shown in the last row.

| patient |                     | volume        |                   |                 |             |
|---------|---------------------|---------------|-------------------|-----------------|-------------|
| case    | temporal lobe       | single tissue | multi tissue      | ventricles      | resection   |
| 0529    | left                | 3619          | 5060              | 263             | 26          |
| 0614    | left                | 2692          | 4112              | 196             | 26          |
| 0660    | left                | 2795          | 4308              | 198             | 32          |
| 0685    | left                | 2425          | 4093              | 164             | 30          |
| 0535    | right               | 2662          | 4225              | 174             | 27          |
| 0555    | right               | 2221          | 3932              | 140             | 30          |
| 0603    | right               | 2742          | 4348              | 169             | 42          |
| 0684    | right               | 2250          | 3930              | 137             | 38          |
|         | <b>median (MAD)</b> | 2677<br>(185) | 4168.5<br>(159.5) | 171.5<br>(25.5) | 30<br>(3.5) |

## 5 Synthetic brain phantom

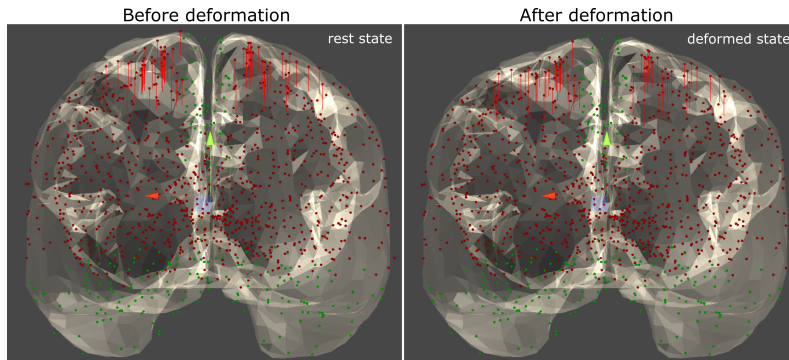

**Fig. 6** Validation on MNI phantom. Nodes under deformation (red circles) and boundary conditions (green circles) are of brain tissue (translucent). An external force of 10 N (red vertical lines) is applied for compression to a subset of nodes located superiorly.

## 6 Temporal lobe resection cases

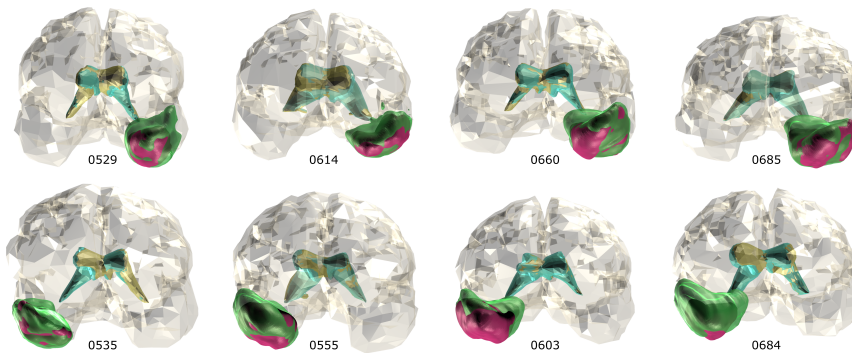

**Fig. 7** Application to account for brain shift in temporal lobe resection cases. *Rest state* of ventricles (in yellow) and manually-delineated resection mask (in green) in pre-operative images. *Deformed state* of ventricles (in blue) and automatedly-segmented resection cavity (in purple) from post-operative images.

**Acknowledgements** This research was funded/supported by the Health Innovation Challenge Fund (WT106882), the Wellcome/EPSRC Centre for Medical Engineering [WT203148/Z/16/Z], and the National Institute for Health Research (NIHR) Biomedical Research Centre based at Guy's and St Thomas' NHS Foundation Trust and King's College London and/or the NIHR Clinical Research Facility. We are grateful to the Wolfson Foundation and the Epilepsy Society for supporting the Epilepsy Society MRI scanner. The views expressed in this publication are those of the authors and not necessarily those of the Wellcome Trust, NHS, the NIHR or the Department of Health. **Ethical Approval** All data were evaluated retrospectively.

All studies involving human participants were in accordance with the ethical standards of the institutional and/or national research committee and with the 1964 Helsinki declaration and its later amendments or comparable ethical standards. **Informed Consent** For this type of study formal consent is not required.

**Conflict of interest.** The authors declare that they have no conflict of interest.

## References

1. Budday, S., Sommer, G., Birkel, C., Langkammer, C., Haybaeck, J., Kohnert, J., Bauer, M., Paulsen, F., Steinmann, P., E.Kuhl, Holzapfel, G.A.: Mechanical characterization of human brain tissue. *Acta Biomaterialia* **48**, 319–340 (2017)
2. Mihai, L.A., Budday, S., Holzapfel, G.A., Kuhl, E., Goriely, A.: A family of hyperelastic models for human brain tissue. *J Mech and Physics Solids* **106**, 60–79 (2017)
3. Mihai, L.A., Chin, L., Janmey, P.A., Goriely, A.: A comparison of hyperelastic constitutive models applicable to brain and fat tissues. *Royal Soc* **12**, 1–12 (2015)
4. Morin, F., Chabanas, M., Courtecuisse, H., Payan, Y.: Biomechanical modelling of brain soft tissues for medical applications. *Biomech Living Organs* pp. 127–146 (2017)
5. Xu, H., Sin, F., Zhu, Y., Barbic, J.: Nonlinear Material Design Using Principal Stretches. *ACM Transactions on Graphics* pp. 1–11 (2015)
